# Supplementary material for: SLAMF1 contributes to cell survival through the AKT signaling pathway in Farage cells
Source: PubMed Central journal article supplement (PMC7473542; doi:10.1371/journal.pone.0238791), 2020-09-04

Figure 1D in manuscript

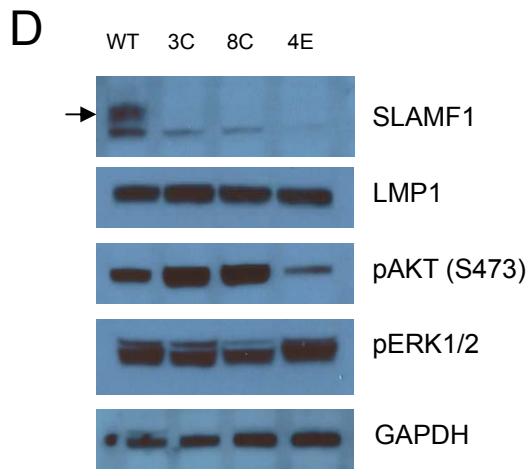

Raw data

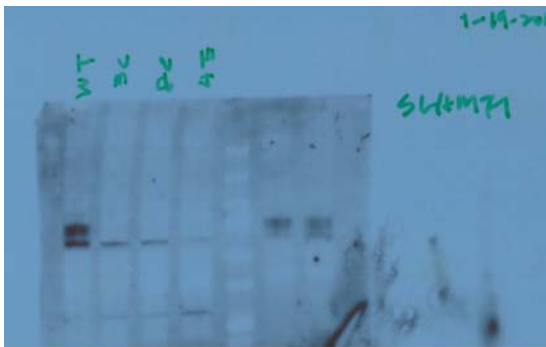

western blot: SLAMF1

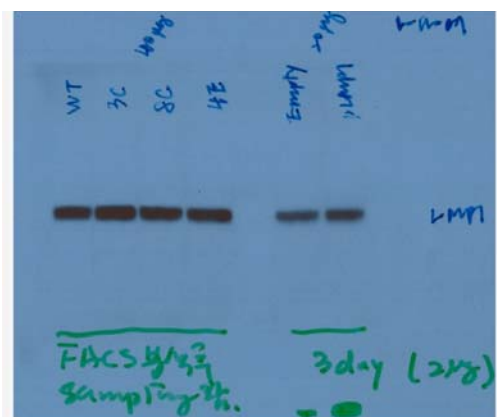

western blot: LMP1

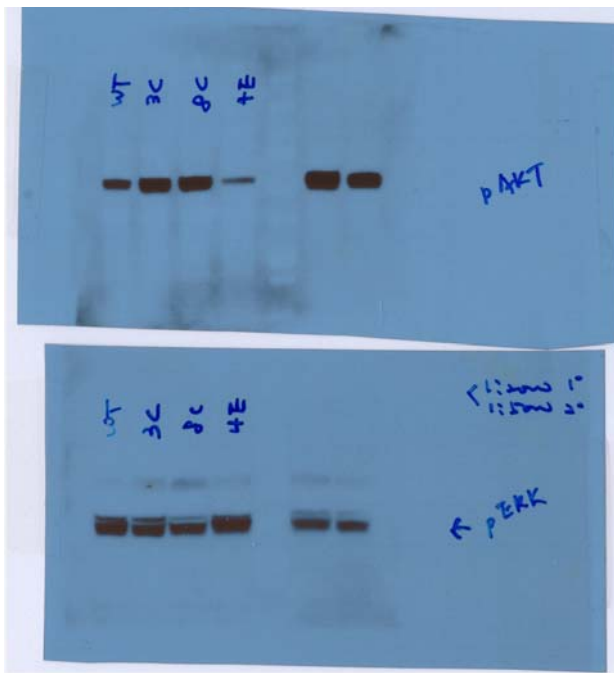

western blot: p-AKT and p-ERK

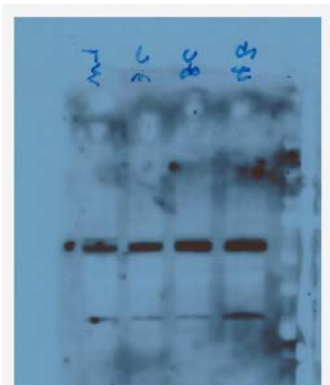

western blot: GAPDH

Figure 4C in manuscript

C

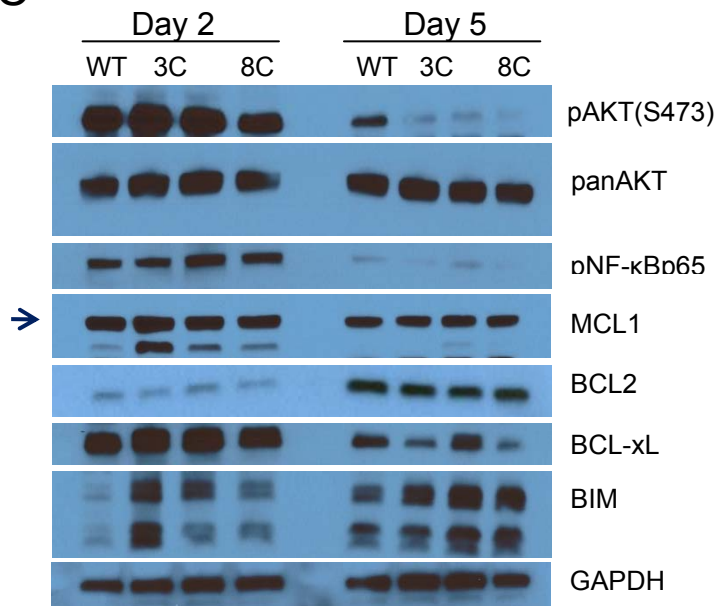

Raw data

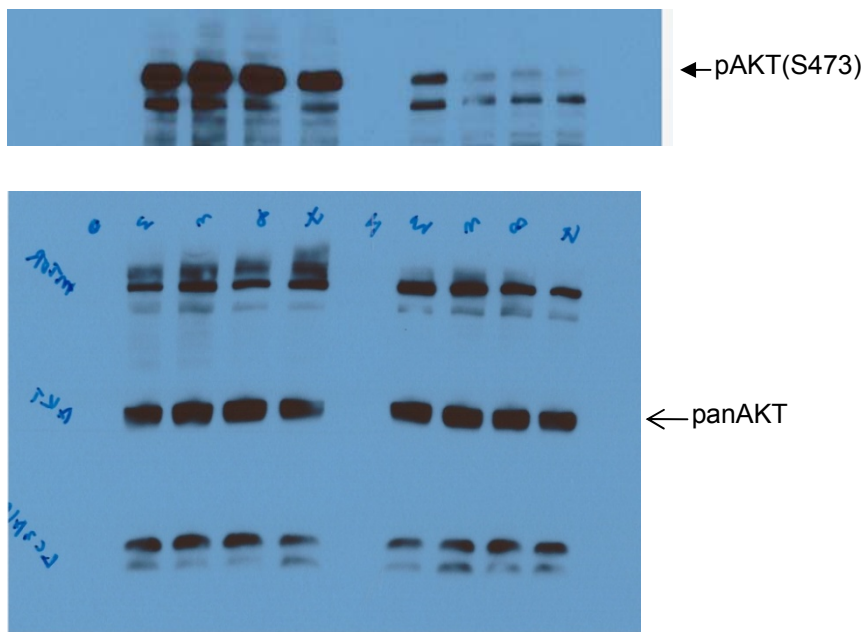

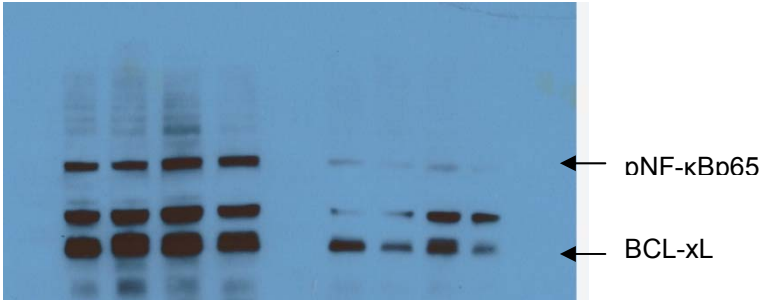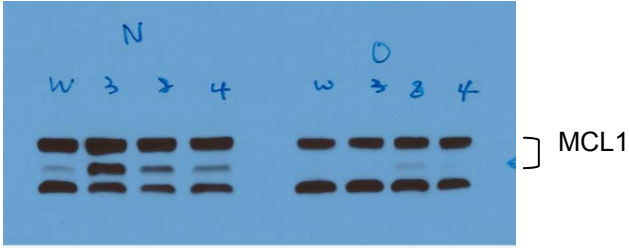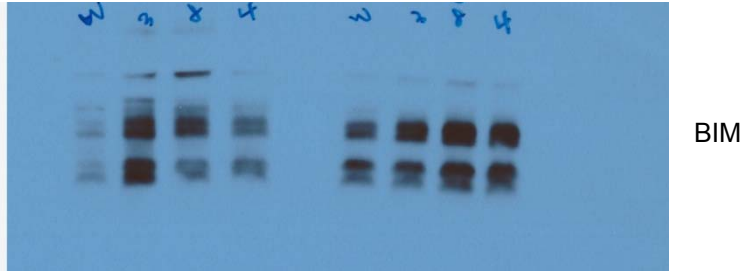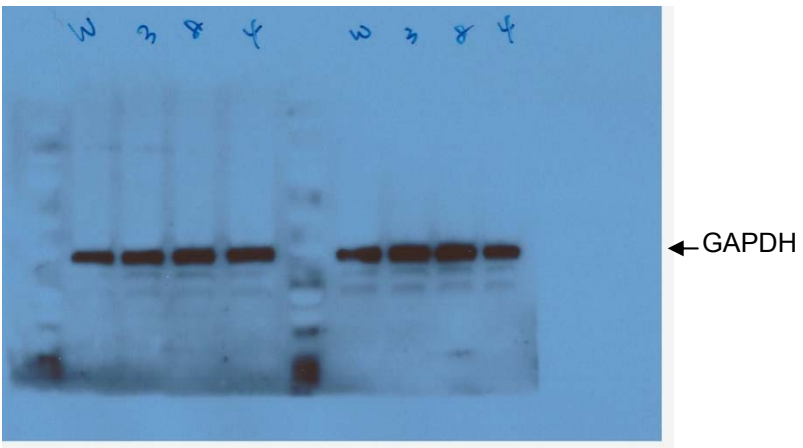

Repeat western blot: MCL1, pAKT(S473), BCL2, BIM

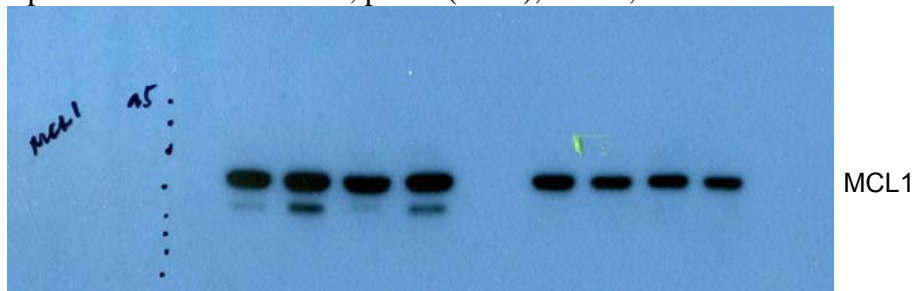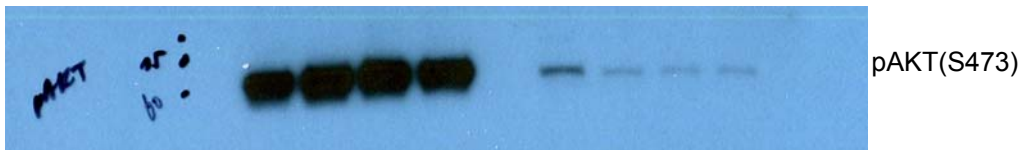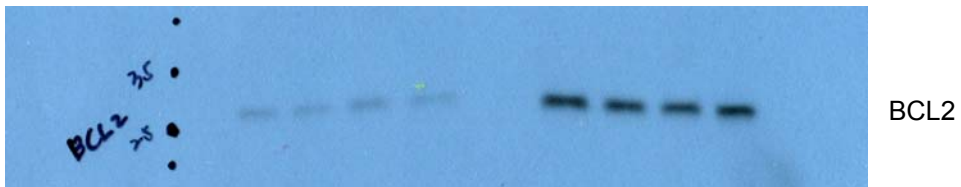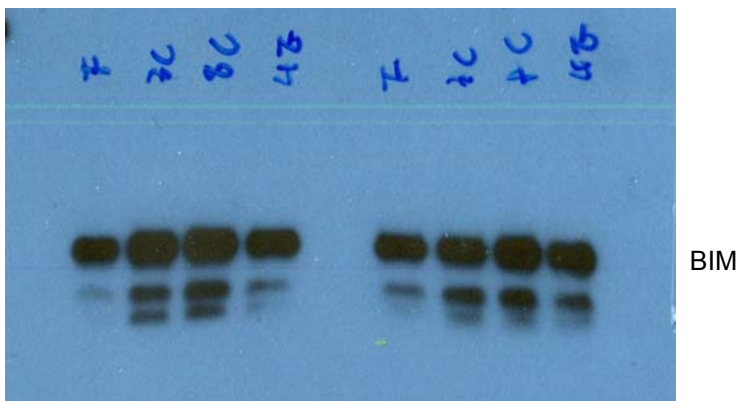

Supplement: pone.0238791.s001.pdf [file pone.0238791.s001.pdf]
